# Supplementary material for: Toward Zero Hunger Through Coupled Ecological Sanitation-Agriculture Systems
Source: Frontiers journal article supplement (doi:10.3389/fsufs.2021.716140), 2021-10-01
Supplement: Table_1.pdf [file Table_1.pdf]

## Supplemental Material

**Supplemental Table 1.** Radish leaf nutrient concentrations from the first two crop cycles. Letters indicate treatment differences as determined by a one-way analysis of variance and post-hoc Tukey means comparisons with  $p < 0.05$ .

| Crop Cycle | Treatment     | Radish Leaf Nutrient Concentrations |                 |                 |                 |                               |                               |                              |                        |                        |                        |                        |                        |                             |
|------------|---------------|-------------------------------------|-----------------|-----------------|-----------------|-------------------------------|-------------------------------|------------------------------|------------------------|------------------------|------------------------|------------------------|------------------------|-----------------------------|
|            |               | N (%)                               | Ca (%)          | K (%)           | Mg (%)          | Na (%)                        | P (%)                         | Cl (%)                       | As ( $\mu\text{g/g}$ ) | Cu ( $\mu\text{g/g}$ ) | Fe ( $\mu\text{g/g}$ ) | Mn ( $\mu\text{g/g}$ ) | Pb ( $\mu\text{g/g}$ ) | Zn ( $\mu\text{g/g}$ )      |
| 1          | Control       | 2.59 $\pm$ 0.07 <sup>b</sup>        | 3.56 $\pm$ 0.58 | 1.68 $\pm$ 0.07 | 0.39 $\pm$ 0.01 | 0.11 $\pm$ 0.01 <sup>c</sup>  | 0.34 $\pm$ 0.01 <sup>a</sup>  | 1.32 $\pm$ 0.13 <sup>c</sup> | 6.24 $\pm$ 0.41        | 7.86 $\pm$ 1.64        | 163 $\pm$ 30.3         | 292 $\pm$ 52           | 1.00 $\pm$ 0.58        | 76.5 $\pm$ 13 <sup>a</sup>  |
|            | Urea          | 2.33 $\pm$ 0.05 <sup>b</sup>        | 5.06 $\pm$ 0.33 | 1.60 $\pm$ 0.10 | 0.33 $\pm$ 0.02 | 0.25 $\pm$ 0.02 <sup>bc</sup> | 0.28 $\pm$ 0.02 <sup>ab</sup> | 0.92 $\pm$ 0.09 <sup>c</sup> | 2.49 $\pm$ 1.44        | 7.34 $\pm$ 1.41        | 247 $\pm$ 89.5         | 274 $\pm$ 43           | N.D.                   | 49.4 $\pm$ 3.4 <sup>b</sup> |
|            | Compost       | 3.31 $\pm$ 0.36 <sup>a</sup>        | 3.41 $\pm$ 0.49 | 2.39 $\pm$ 0.50 | 0.34 $\pm$ 0.02 | 0.44 $\pm$ 0.09 <sup>ab</sup> | 0.30 $\pm$ 0.04 <sup>ab</sup> | 3.43 $\pm$ 0.31 <sup>b</sup> | 5.89 $\pm$ 0.06        | 7.40 $\pm$ 0.66        | 198 $\pm$ 69           | 205 $\pm$ 18           | 0.68 $\pm$ 0.39        | 31.7 $\pm$ 3.1 <sup>b</sup> |
|            | Biosolids     | 2.69 $\pm$ 0.10 <sup>b</sup>        | 3.81 $\pm$ 0.61 | 2.07 $\pm$ 0.24 | 0.35 $\pm$ 0.03 | 0.37 $\pm$ 0.09 <sup>ab</sup> | 0.28 $\pm$ 0.01 <sup>ab</sup> | 5.06 $\pm$ 1.04 <sup>a</sup> | 0.81 $\pm$ 0.47        | 6.00 $\pm$ 0.94        | 185 $\pm$ 44           | 155 $\pm$ 15           | N.D.                   | 44.8 $\pm$ 3.7 <sup>b</sup> |
|            | Biofertilizer | 2.43 $\pm$ 0.06 <sup>b</sup>        | 4.00 $\pm$ 0.77 | 1.76 $\pm$ 0.39 | 0.35 $\pm$ 0.00 | 0.56 $\pm$ 0.08 <sup>a</sup>  | 0.23 $\pm$ 0.02 <sup>c</sup>  | 0.76 $\pm$ 0.10 <sup>c</sup> | 2.17 $\pm$ 0.42        | 5.55 $\pm$ 0.26        | 169 $\pm$ 28           | 190 $\pm$ 31           | N.D.                   | 38.0 $\pm$ 1.5 <sup>b</sup> |
| 2          | Control       | 1.90 $\pm$ 0.20                     | 3.32 $\pm$ 0.53 | 2.77 $\pm$ 0.14 | 0.36 $\pm$ 0.01 | 0.12 $\pm$ 0.01 <sup>b</sup>  | 0.37 $\pm$ 0.02               | 0.64 $\pm$ 0.10              | 5.97 $\pm$ 1.61        | 6.65 $\pm$ 0.75        | 254 $\pm$ 28           | 281 $\pm$ 62           | N.D.                   | 99.3 $\pm$ 16               |
|            | Urea          | 2.00 $\pm$ 0.08                     | 5.21 $\pm$ 1.28 | 2.86 $\pm$ 0.49 | 0.46 $\pm$ 0.05 | 0.15 $\pm$ 0.01 <sup>b</sup>  | 0.46 $\pm$ 0.08               | 0.65 $\pm$ 0.08              | N.D.                   | 8.85 $\pm$ 1.33        | 382 $\pm$ 176          | 364 $\pm$ 87           | 0.76 $\pm$ 0.44        | 136 $\pm$ 30                |
|            | Compost       | 2.64 $\pm$ 0.62                     | 4.29 $\pm$ 0.54 | 3.02 $\pm$ 0.40 | 0.38 $\pm$ 0.04 | 0.35 $\pm$ 0.14 <sup>ab</sup> | 0.41 $\pm$ 0.05               | 1.89 $\pm$ 1.14              | 4.29 $\pm$ 0.50        | 7.83 $\pm$ 0.67        | 536 $\pm$ 229          | 233 $\pm$ 28           | N.D.                   | 73.6 $\pm$ 18.3             |
|            | Biosolids     | 2.94 $\pm$ 0.23                     | 5.33 $\pm$ 0.34 | 2.06 $\pm$ 0.06 | 0.42 $\pm$ 0.02 | 0.25 $\pm$ 0.05 <sup>b</sup>  | 0.34 $\pm$ 0.03               | 2.94 $\pm$ 2.00              | N.D.                   | 5.83 $\pm$ 0.83        | 312 $\pm$ 9.6          | 145 $\pm$ 50           | N.D.                   | 102 $\pm$ 7.0               |
|            | Biofertilizer | 2.71 $\pm$ 0.20                     | 4.47 $\pm$ 0.52 | 2.53 $\pm$ 0.28 | 0.43 $\pm$ 0.02 | 0.50 $\pm$ 0.05 <sup>a</sup>  | 0.42 $\pm$ 0.02               | 0.61 $\pm$ 0.12              | N.D.                   | 5.68 $\pm$ 0.47        | 236 $\pm$ 38           | 162 $\pm$ 25           | 0.91 $\pm$ 0.53        | 72.9 $\pm$ 3.8              |

N.D. indicates non-detectable levels of an element.

**Supplemental Table 2.** Average annual production of crops and N, P, and K removal by crops in Haiti for 2017 to 2019. Crop production data were obtained from the FAOSTAT database for the years 2017, 2018, and 2019. Crop N, P, and K was calculated based on crop production and crop-specific nutritional demands (Roy et al. 2006).

| <b>FAOSTAT Crop Type<sup>1</sup></b>         | <b>Average Production<br/>(Mt/y)</b> | <b>Crop N<br/>(Mt/y)<sup>2</sup></b> | <b>Crop P<br/>(Mt/y)</b> | <b>Crop K<br/>(Mt/y)</b> |
|----------------------------------------------|--------------------------------------|--------------------------------------|--------------------------|--------------------------|
| Sugar cane                                   | 1643279                              | 3451                                 | 862                      | 4637                     |
| Mangoes, mangosteens, guavas                 | 488840                               | 3275                                 | 363                      | 2718                     |
| Bananas                                      | 254984                               | 1428                                 | 145                      | 4296                     |
| Avocados                                     | 220334                               | 3525                                 | 1348                     | 8595                     |
| Rice, paddy                                  | 173548                               | 3471                                 | 834                      | 4321                     |
| Vegetables, fresh nes                        | 117015                               | 316                                  | 46                       | 350                      |
| Rice, paddy (rice milled equivalent)         | 115756                               | 2315                                 | 556                      | 2882                     |
| Oranges                                      | 78531                                | 707                                  | 69                       | 763                      |
| Sorghum                                      | 53898                                | 803                                  | 174                      | 201                      |
| Grapefruit (inc. pomelos)                    | 48934                                | 440                                  | 43                       | 475                      |
| Pigeon peas                                  | 45303                                | 3207                                 | 303                      | 602                      |
| Potatoes                                     | 42805                                | 141                                  | 17                       | 220                      |
| Cow peas, dry                                | 30716                                | 823                                  | 75                       | 456                      |
| Coconuts                                     | 27903                                | 226                                  | 48                       | 280                      |
| Tangerines, mandarins, clementines, satsumas | 22395                                | 202                                  | 20                       | 217                      |
| Groundnuts, with shell                       | 19662                                | 1142                                 | 168                      | 491                      |
| Cabbages and other brassicas                 | 18089                                | 52                                   | 6                        | 44                       |
| Pineapples                                   | 8024                                 | 14                                   | 2                        | 41                       |
| Fruit, tropical fresh nes                    | 2781                                 | 8                                    | 1                        | 5                        |
| Castor oil seed                              | 1539                                 | 62                                   | 6                        | 20                       |
| Eggplants (aubergines)                       | 856                                  | 20                                   | 3                        | 23                       |

|                         |                |              |             |              |
|-------------------------|----------------|--------------|-------------|--------------|
| Seed cotton             | 853            | 21           | 4           | 8            |
| Lettuce and chicory     | 715            | 5            | 1           | 8            |
| Tobacco, unmanufactured | 561            | 16           | 1           | 24           |
| <b>TOTAL</b>            | <b>3417322</b> | <b>25671</b> | <b>5094</b> | <b>31681</b> |

<sup>1</sup> All FAOSTAT crop production data were included in this analysis, except yam, sisal, melon, and chicory root, as these crops lacked information on nutrient removal.

<sup>2</sup> Notes on N, P, and K value selection: Values for cabbages were used for the category “cabbages and all brassicas”. Values for papaya were used for “fruit, tropical fresh nes.” Values for “rice, paddy (rice milled equivalent)” is assumed be the same as “rice, paddy.” All citrus varieties use the reported values for “citrus.” Sorghum uses “sorghum grain” values. Tobacco assumes “flue-cured” values. Tomato values were used for “vegetables, fresh nes”. Nutrient removal rates for avocados, eggplant, and lettuce were derived from an agriculture industry nutrient removal calculator (Loveland Products, 2021).

#### **Supplemental Material References:**

Food and Agriculture Organization of the United Nations. FAOSTAT Statistical Database. [Rome]: FAO, 2021. <http://www.fao.org/faostat/en/#data>

Loveland Products, Inc. Nutrient Removal Calculator. Accessed at <https://cropfertility.com/nutrient-removal-calculator/> on 3/1/2021.

Roy, R.N., A. Finck, G.J.Blair, H.L.S. Tandon. 2006. FAO Plant nutrition for food security: A guide for integrated nutrient management. 366 pg.  
Food and Agriculture Organization of the United Nations. Rome, Italy.
